# Supplementary material
Source: Springer Nature journal article supplement (https://www.springermedizin.de/resource/supplementary/12936_2013_3071_MOESM2_ESM.pdf/9546186)

## increasing knowledge with period of implementation

■ Since Dec 2011   ■ Since Sep & Oct 2011   ■ Since May 2009

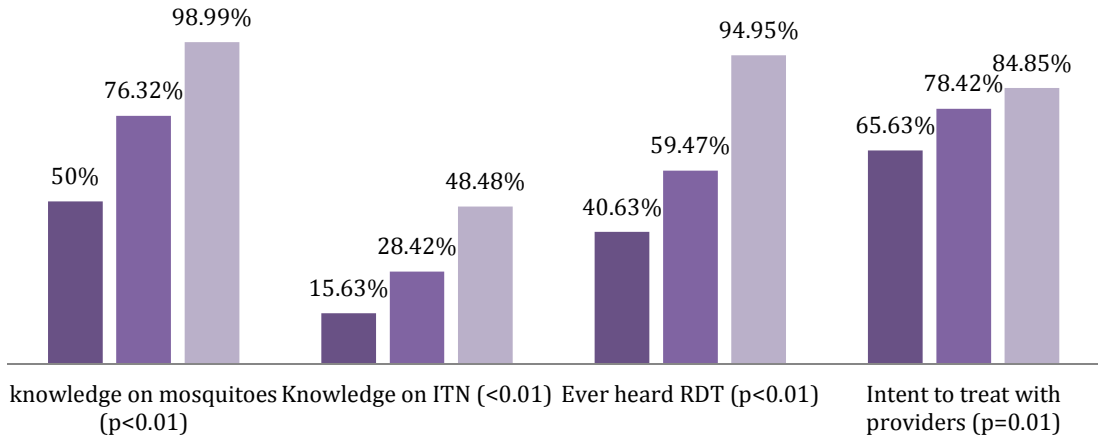

Supplement: MOESM2 [file 9546186]
